# Supplementary material for: Design, Synthesis, and Docking Studies of New Torin2 Analogs as Potential ATR/mTOR Kinase Inhibitors
Source: MDPI journal article supplement (doi:10.3390/molecules23050992), 2018-04-24
Supplement: s1 [file s1]

## Supplementary files

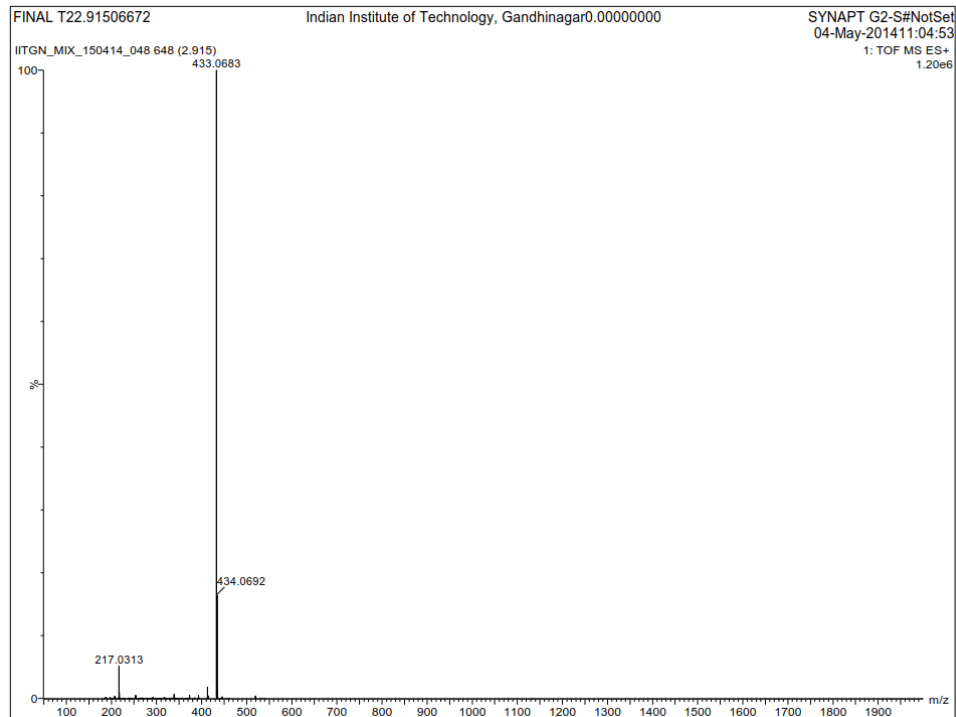

Figure S1: LC-Mass of compound 11

final t2 2

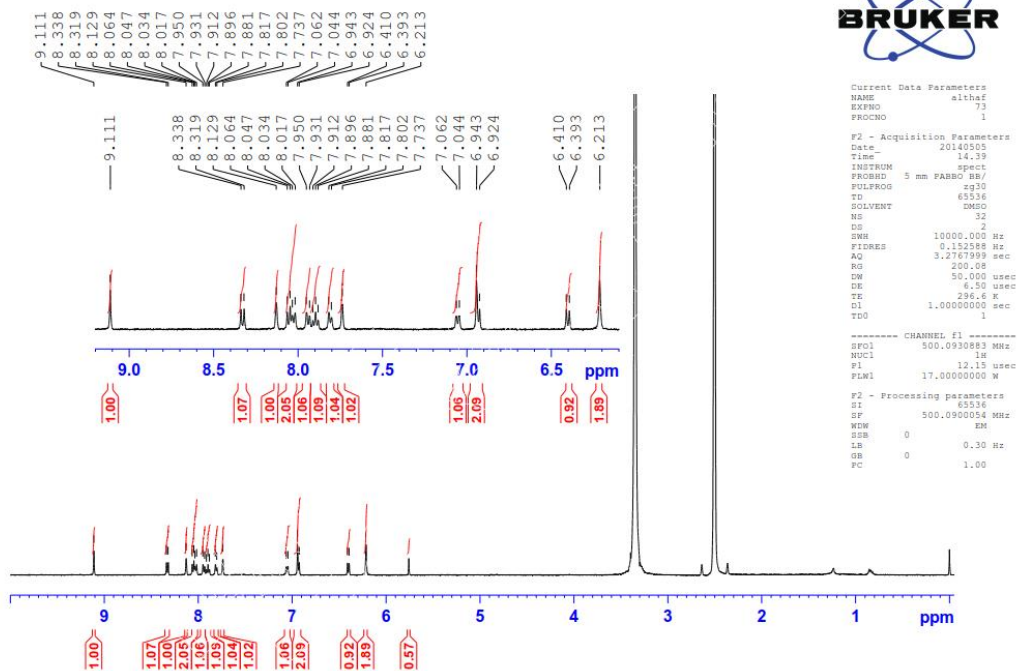

Figure S2: <sup>1</sup>H NMR spectra of compound 11

SPK\_009 13c

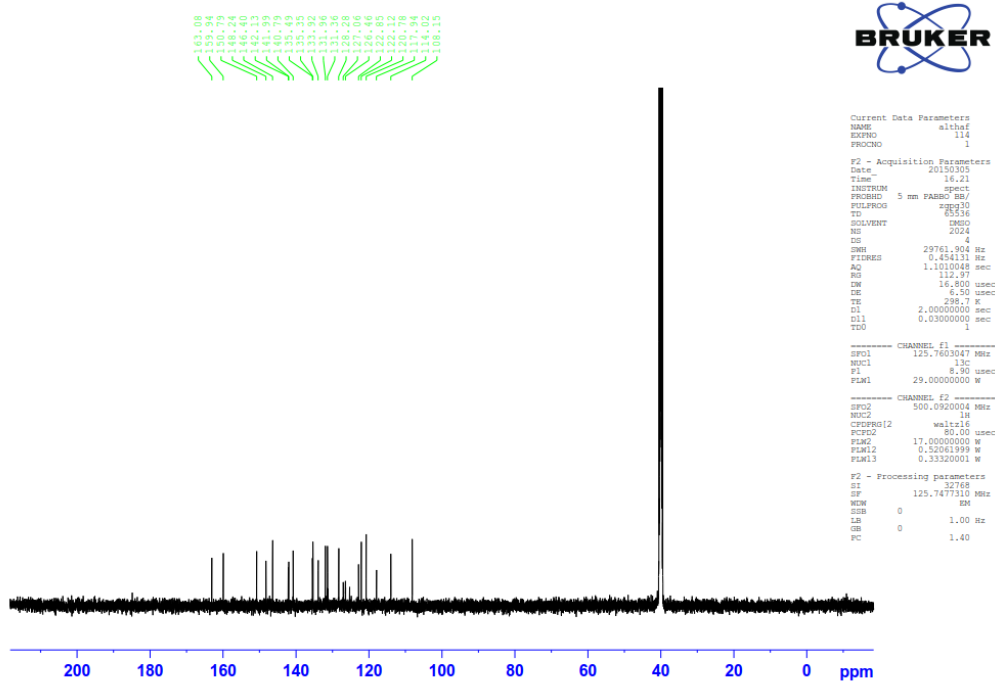

Figure S3:  $^{13}\text{C}$  NMR spectra of compound 11

SPK\_009 1f

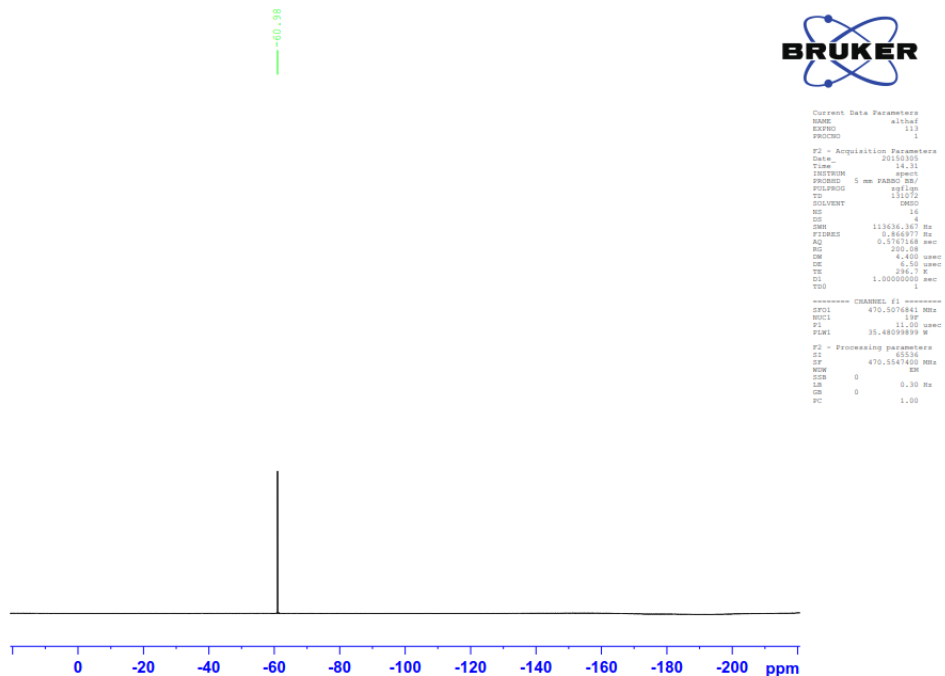

Figure S4:  $^{19}\text{F}$  NMR spectra of compound 11

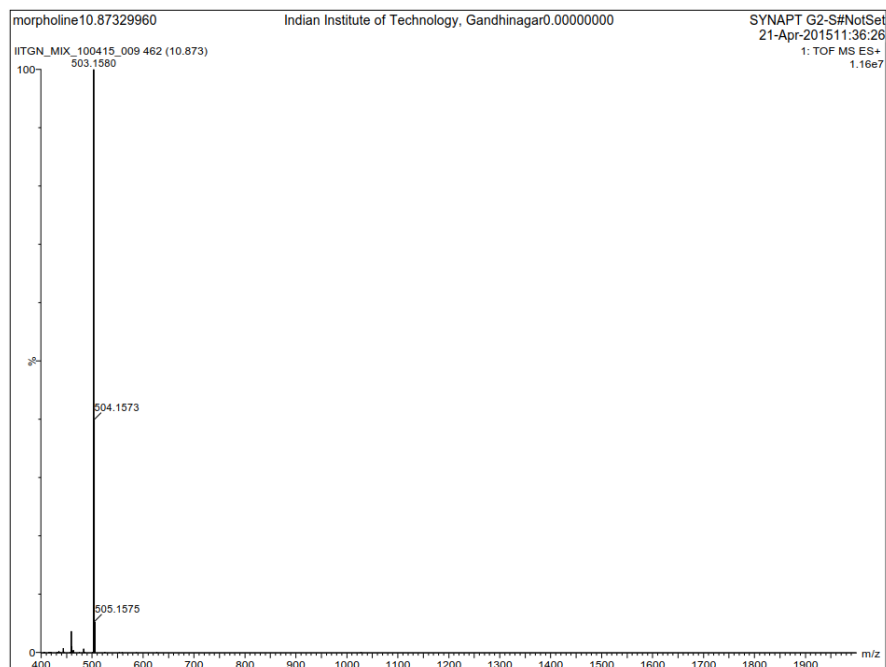

Figure S5: LC-Mass of compound 12

morpholine t2

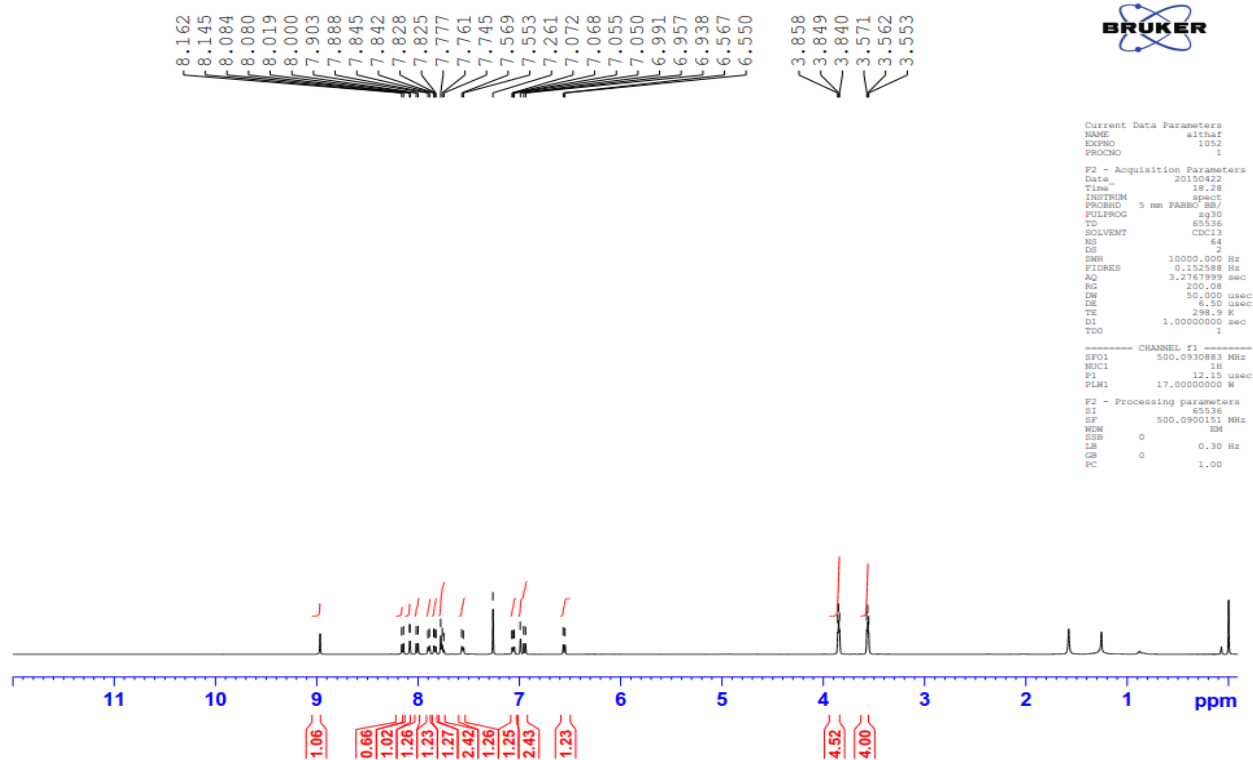

Figure S6:  $^1\text{H}$  NMR spectra of compound 12

SPK 67

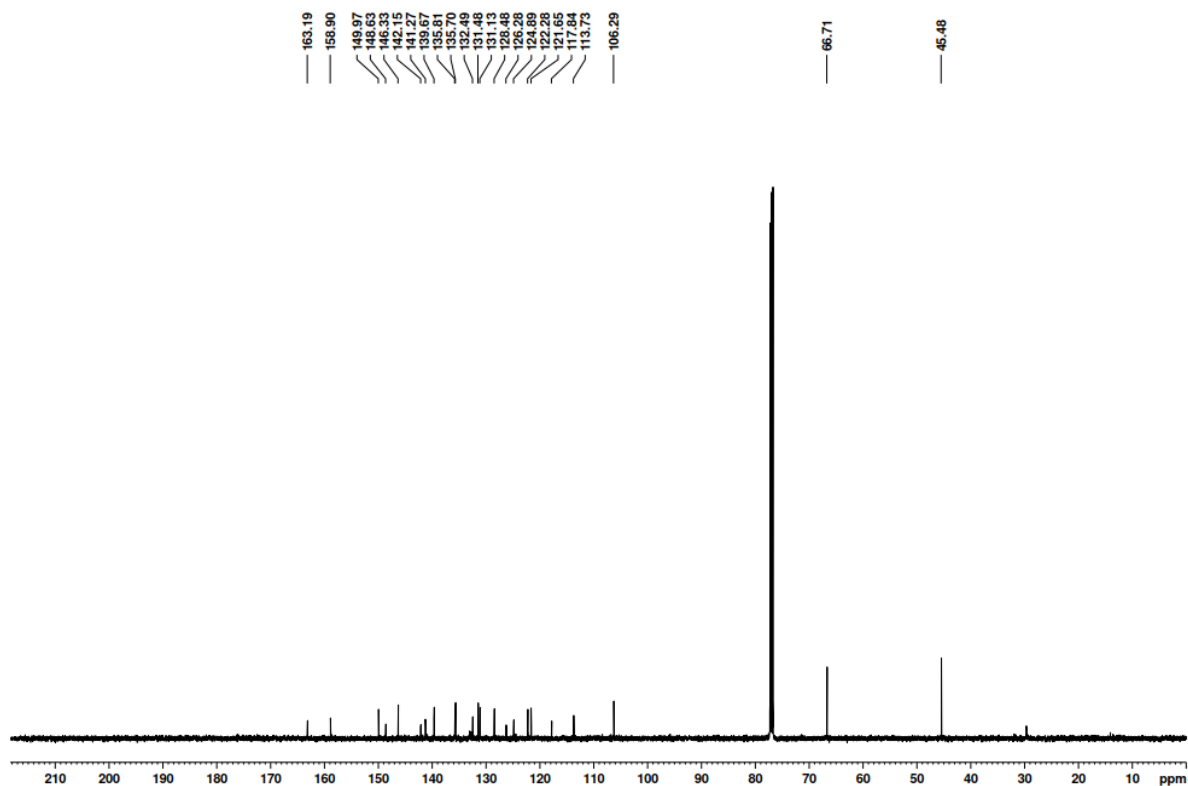

Figure S7: <sup>13</sup>C NMR spectra of compound 12

SPK 67

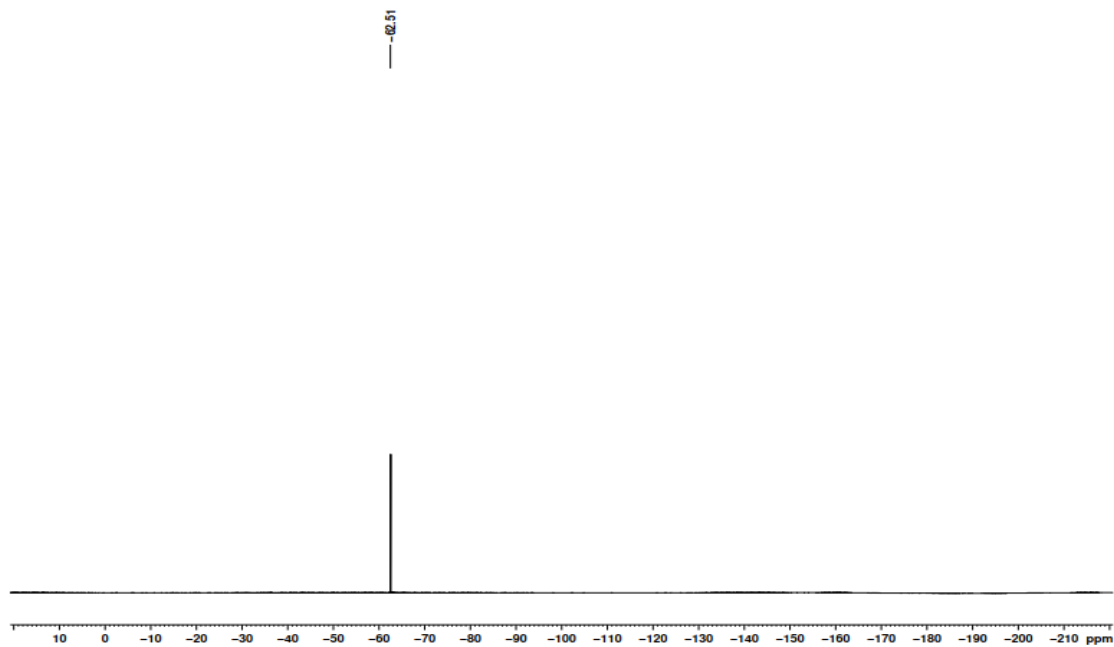

Figure S8: <sup>19</sup>F NMR spectra of compound 12

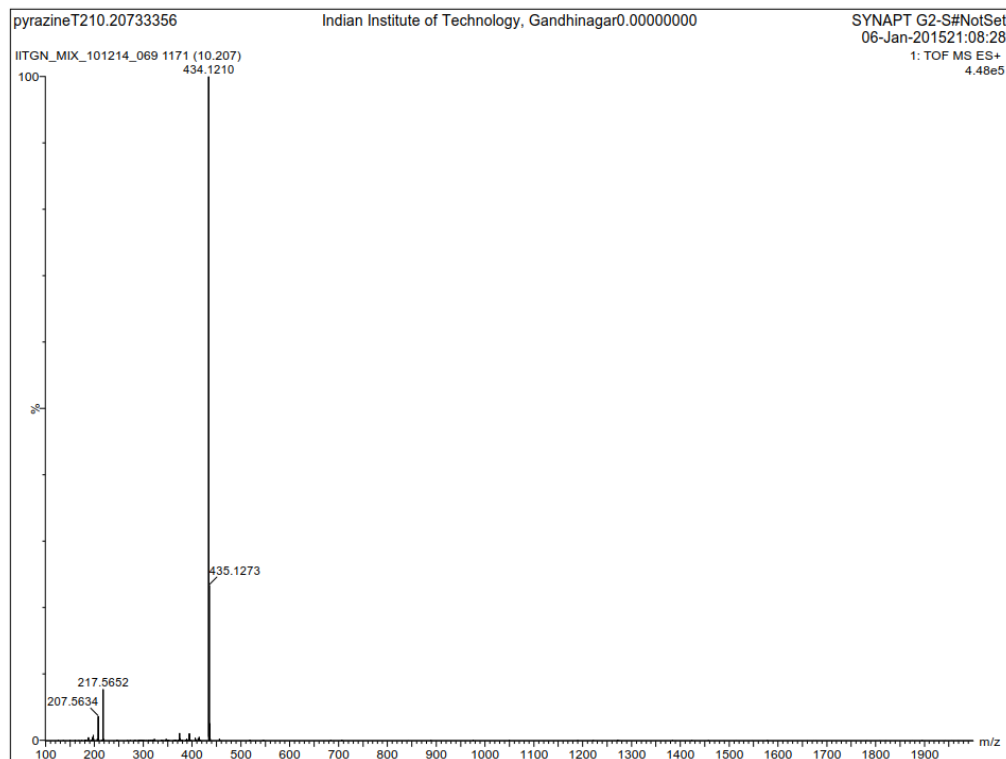

Figure S9: LC-Mass of compound 13

pryzz t2

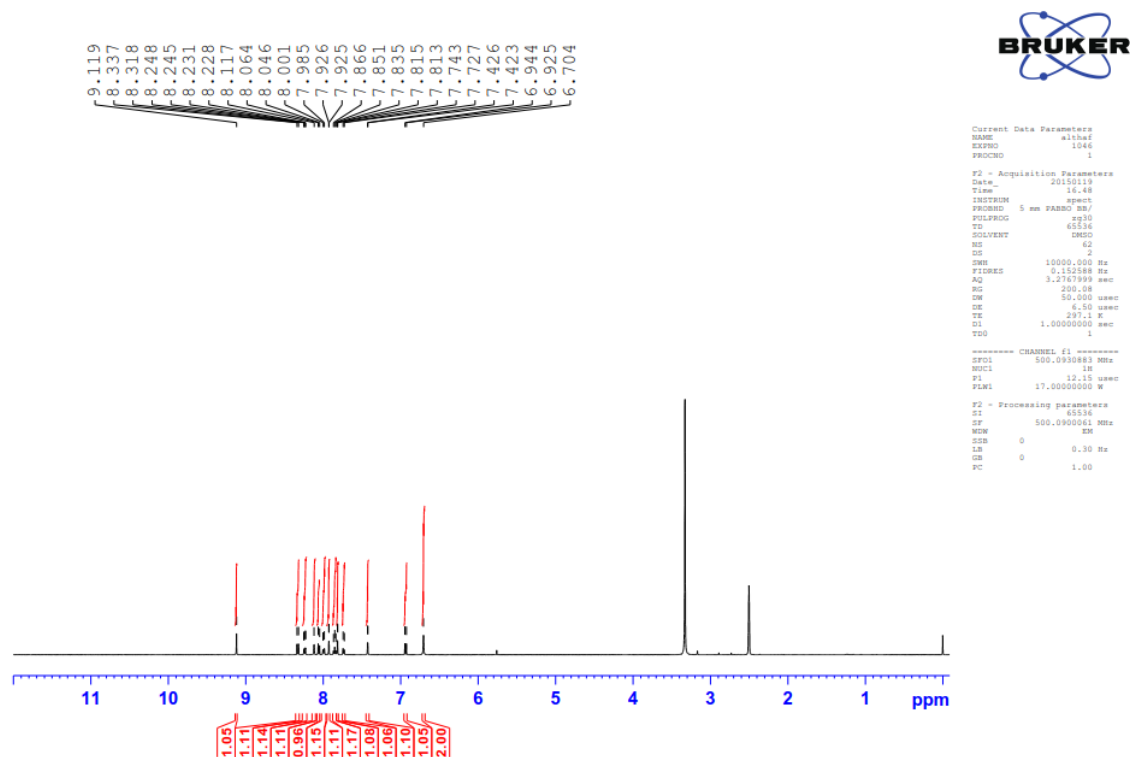

Figure S10: <sup>1</sup>H NMR spectra of compound 13

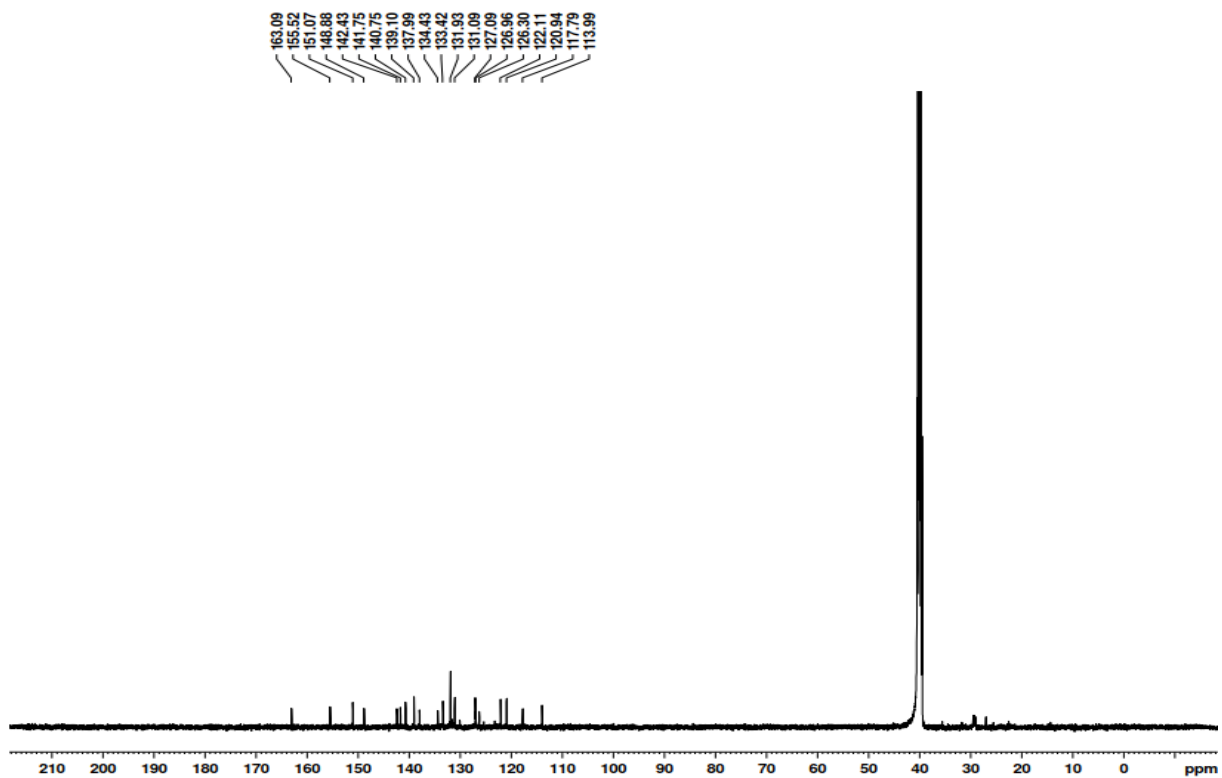

Figure S11: <sup>13</sup>C NMR spectra of compound 13

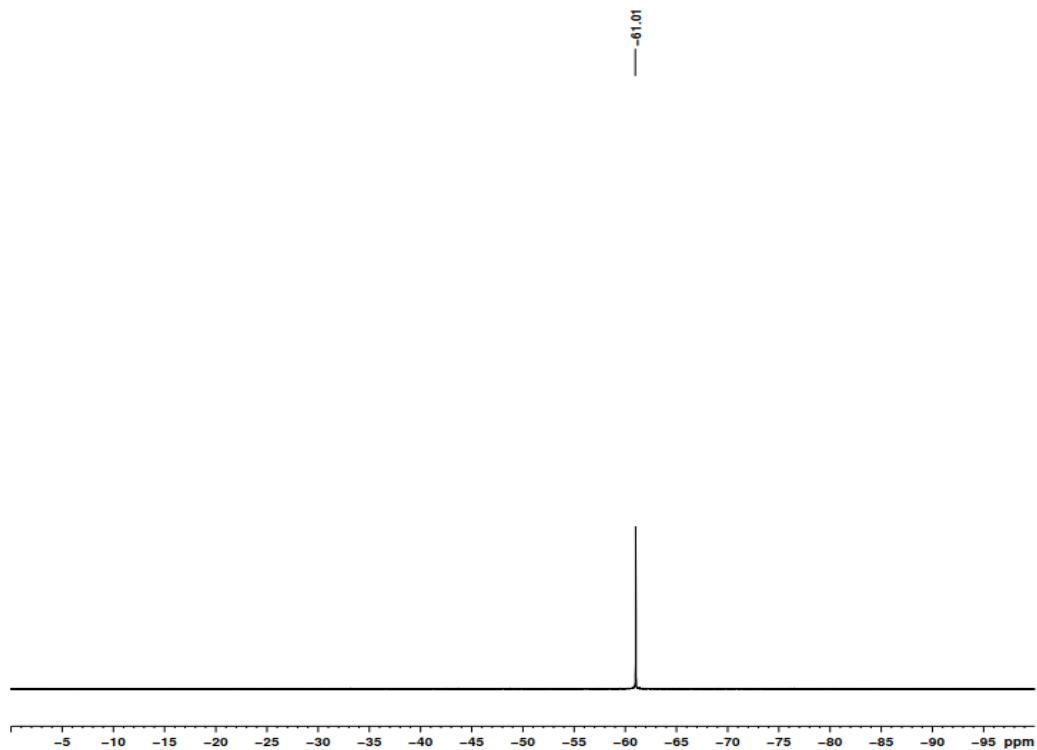

Figure S12: <sup>19</sup>F NMR spectra of compound 13

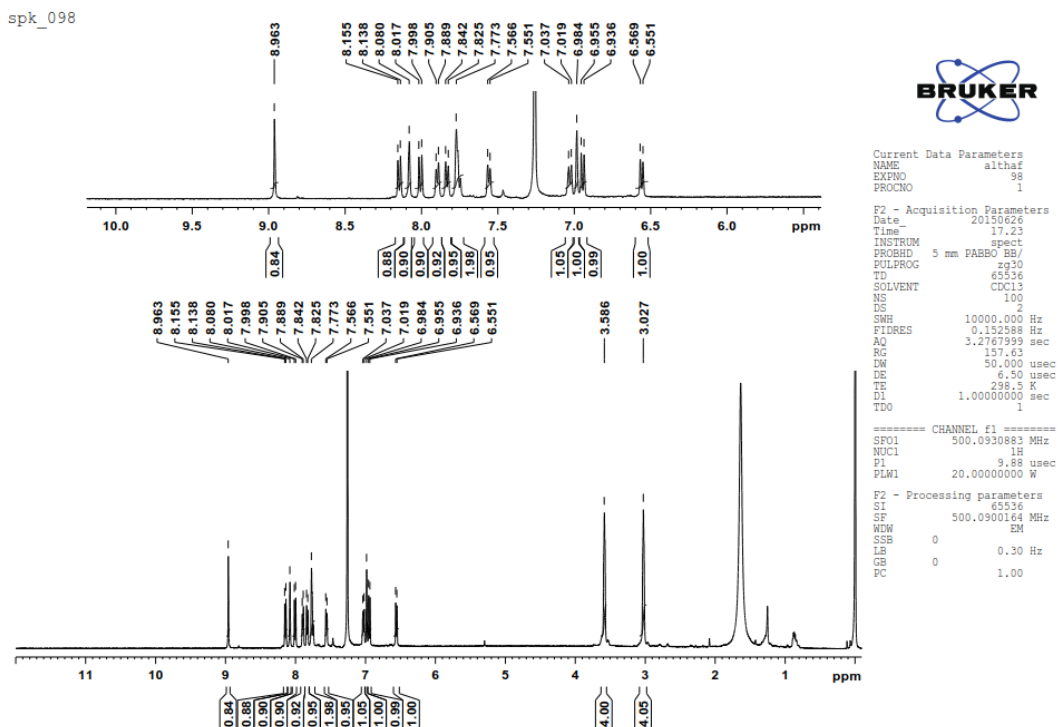

Figure S13:  $^1\text{H}$  NMR spectra of compound 14

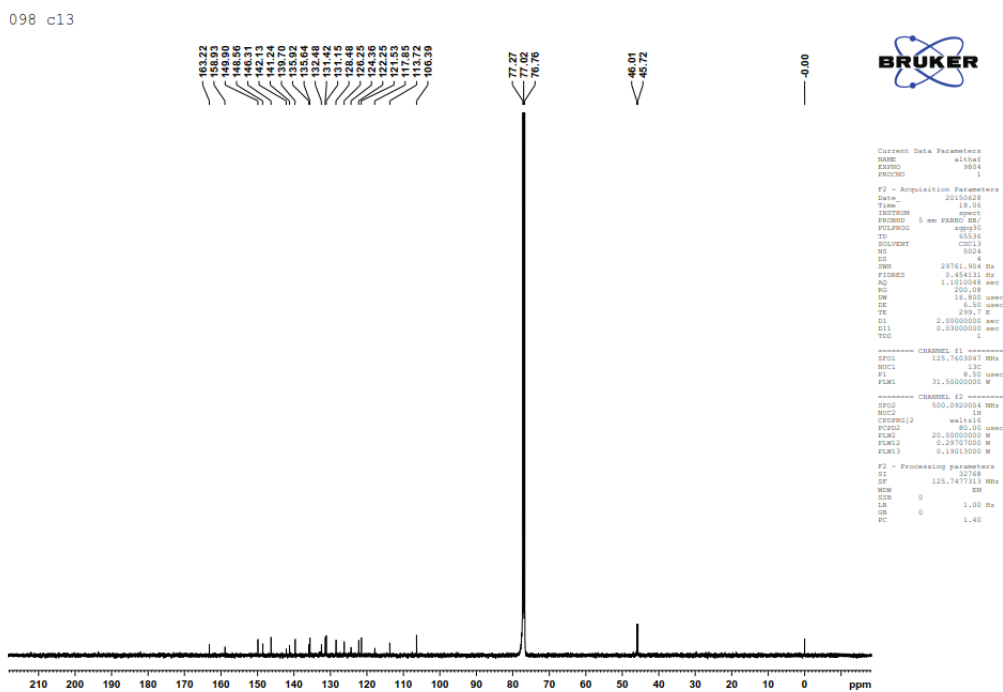

Figure S14:  $^{13}\text{C}$  NMR spectra of compound 14

spk\_098\_f19

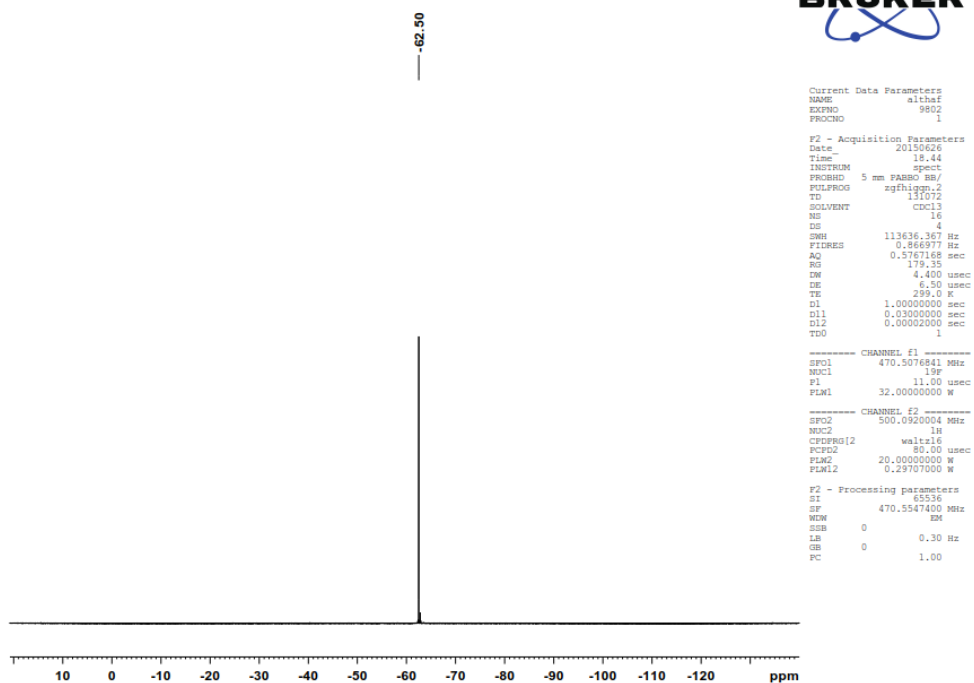

Figure S15:  $^{19}\text{F}$  NMR spectra of compound 14

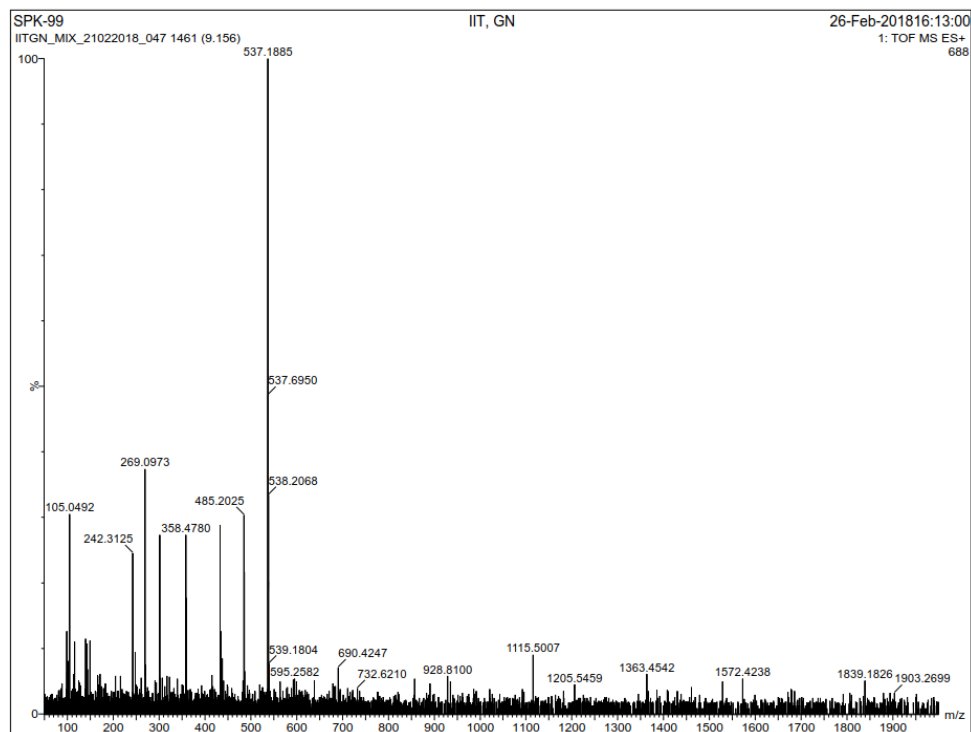

Figure S16: LC-Mass of compound 15

spk\_099

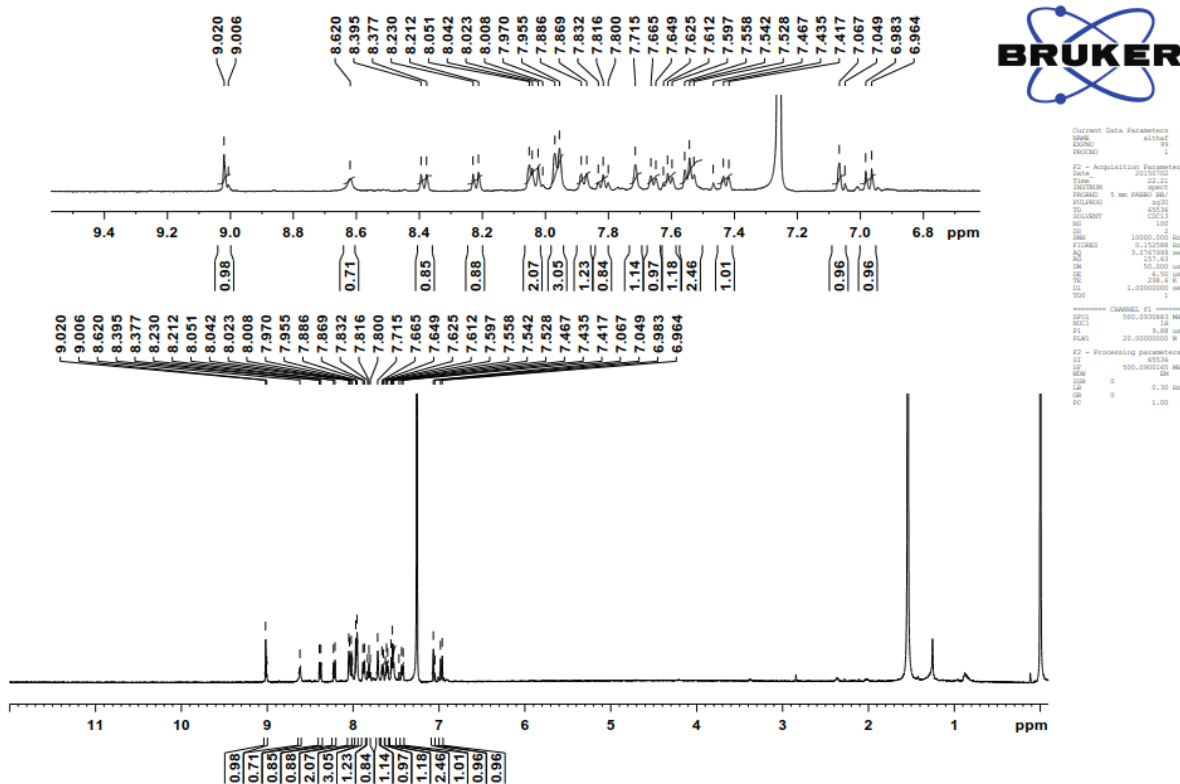

Figure S17:  $^1\text{H}$  NMR spectra of compound 15

spk99\_c13

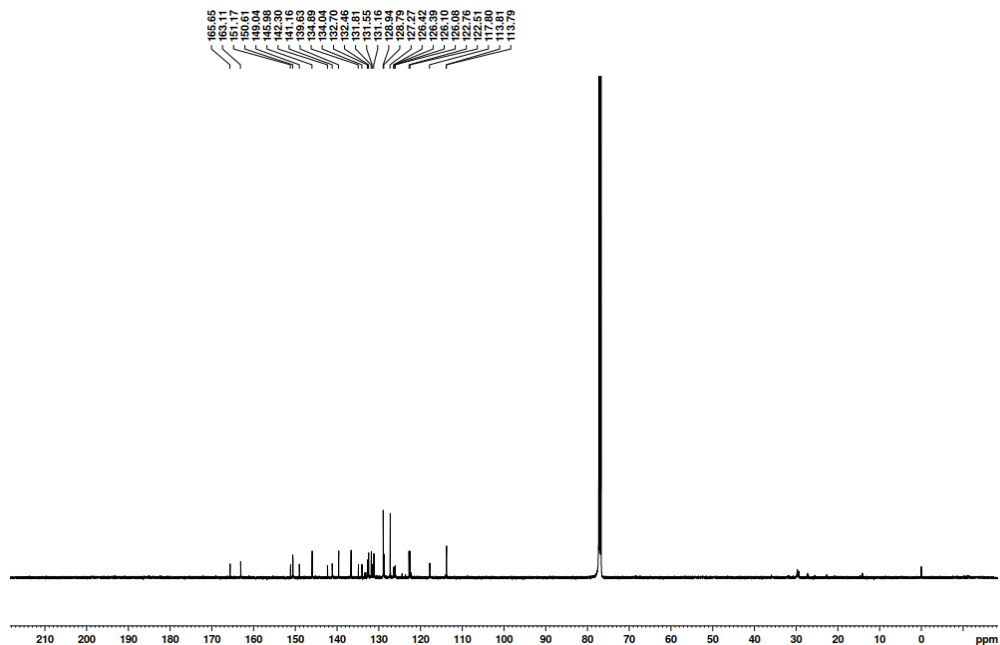

Figure S18:  $^{13}\text{C}$  NMR spectra of compound 15

spk\_099

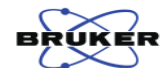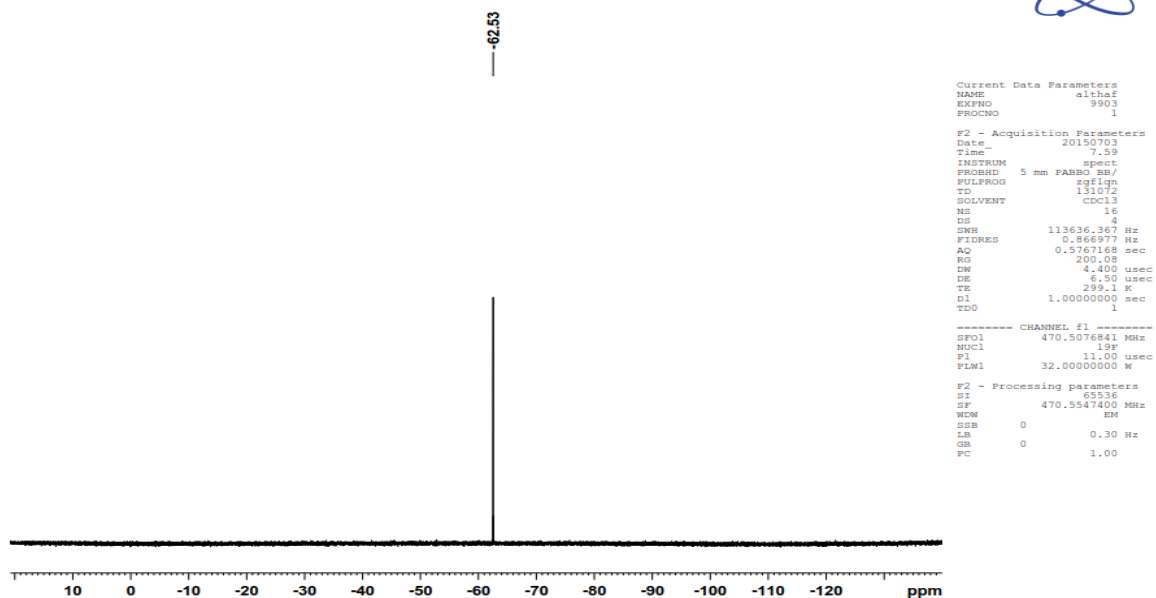

Figure S19:  $^{19}\text{F}$  NMR spectra of compound 15

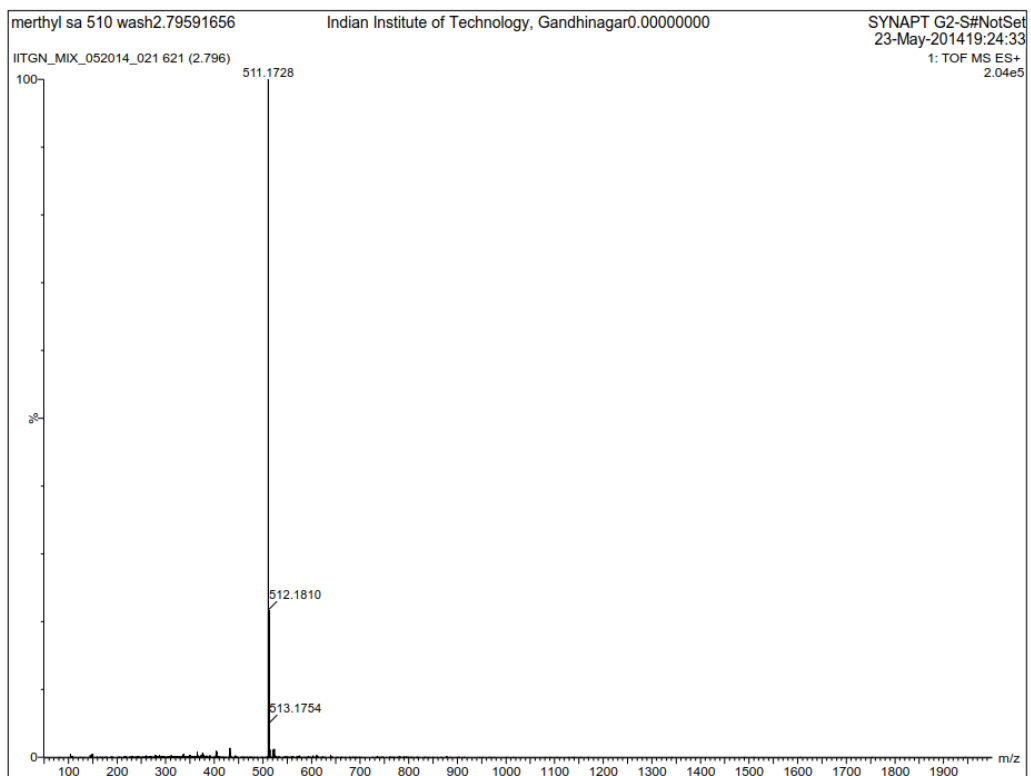

Figure S20: LC-Mass of compound 16

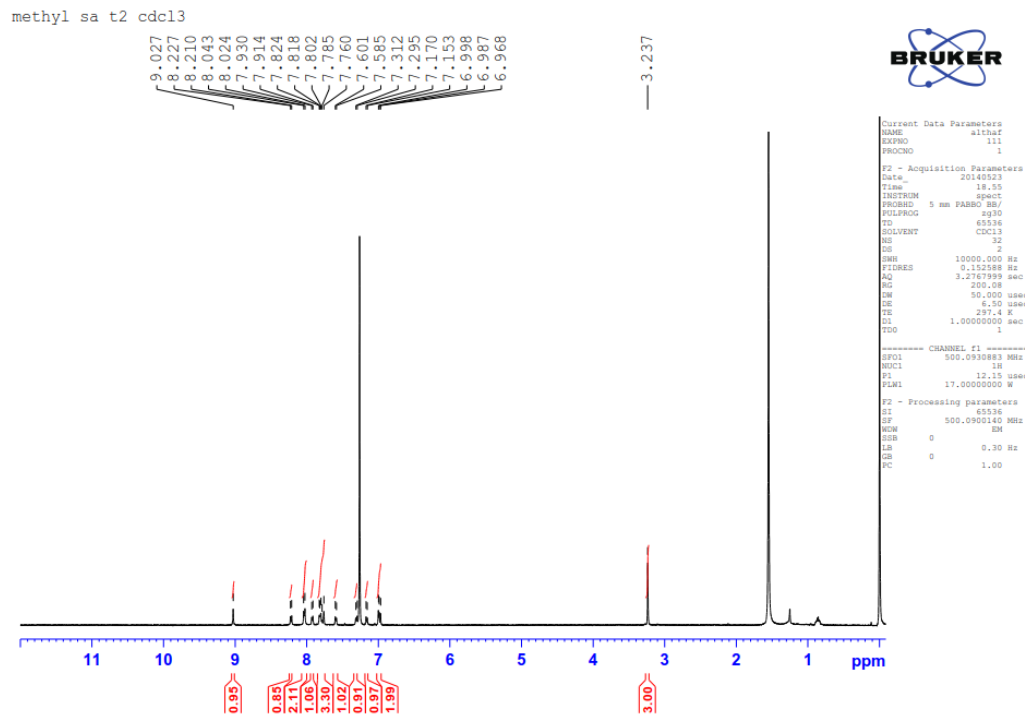

Figure S21:  $^1\text{H}$  NMR spectra of compound 16 ( $\text{CDCl}_3$ )

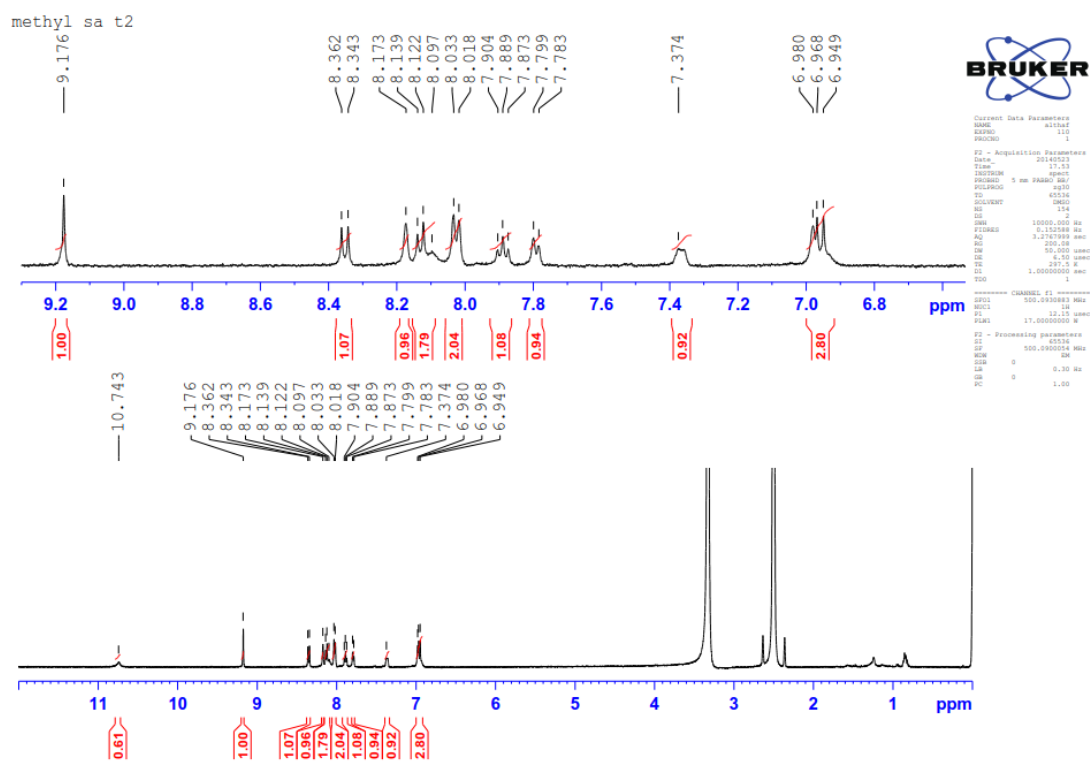

Figure S22:  $^1\text{H}$  NMR spectra of compound 16 ( $\text{DMSO}$ )

sa t2 f19

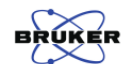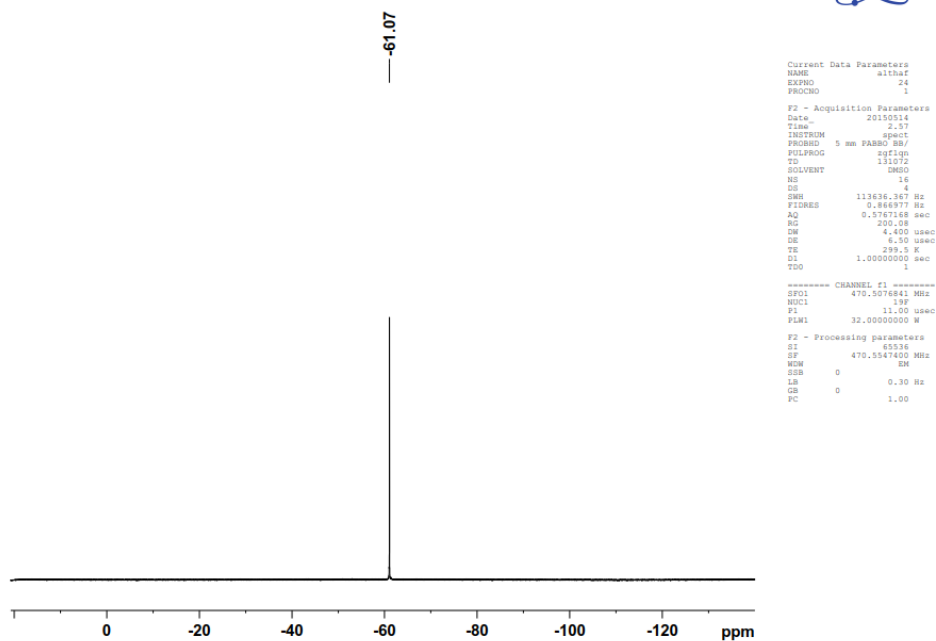

Figure S23:  $^{19}\text{F}$  NMR spectra of compound 16 (DMSO- $d_6$ )

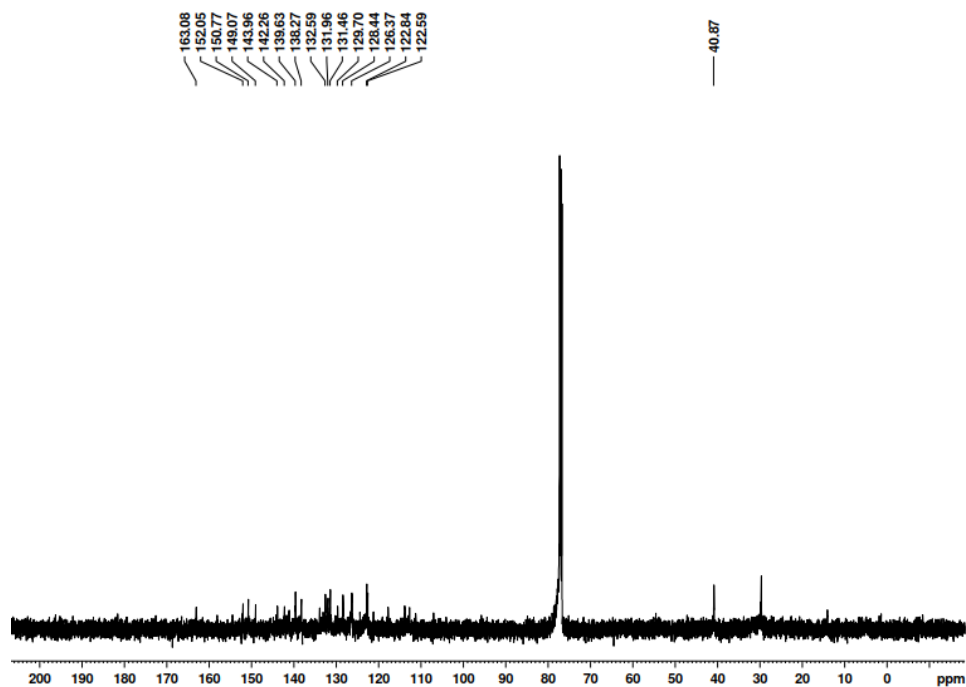

Figure S24:  $^{13}\text{C}$  NMR spectra of compound 16 ( $\text{CDCl}_3$ )

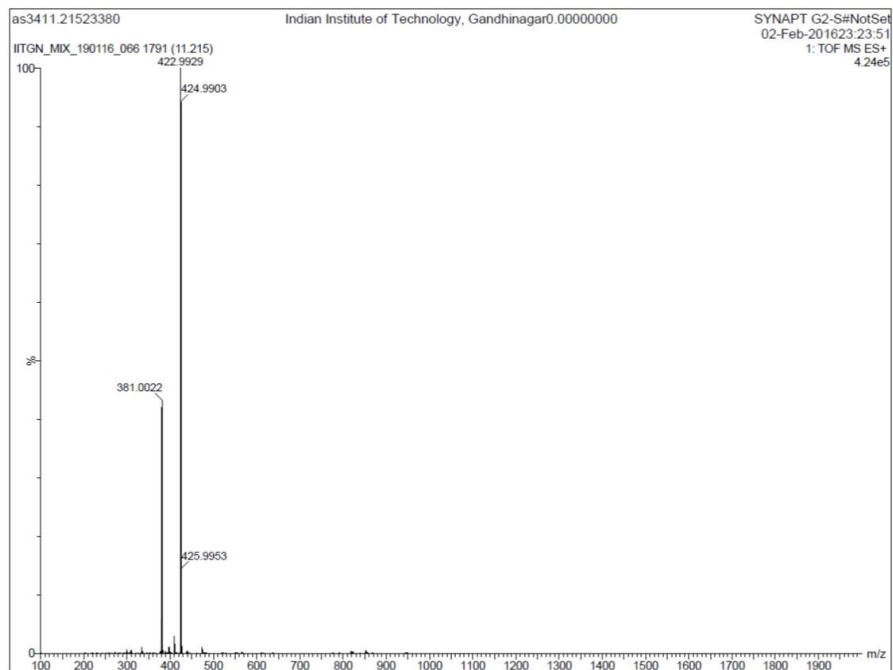

Figure S25: LC-Mass of compound 17

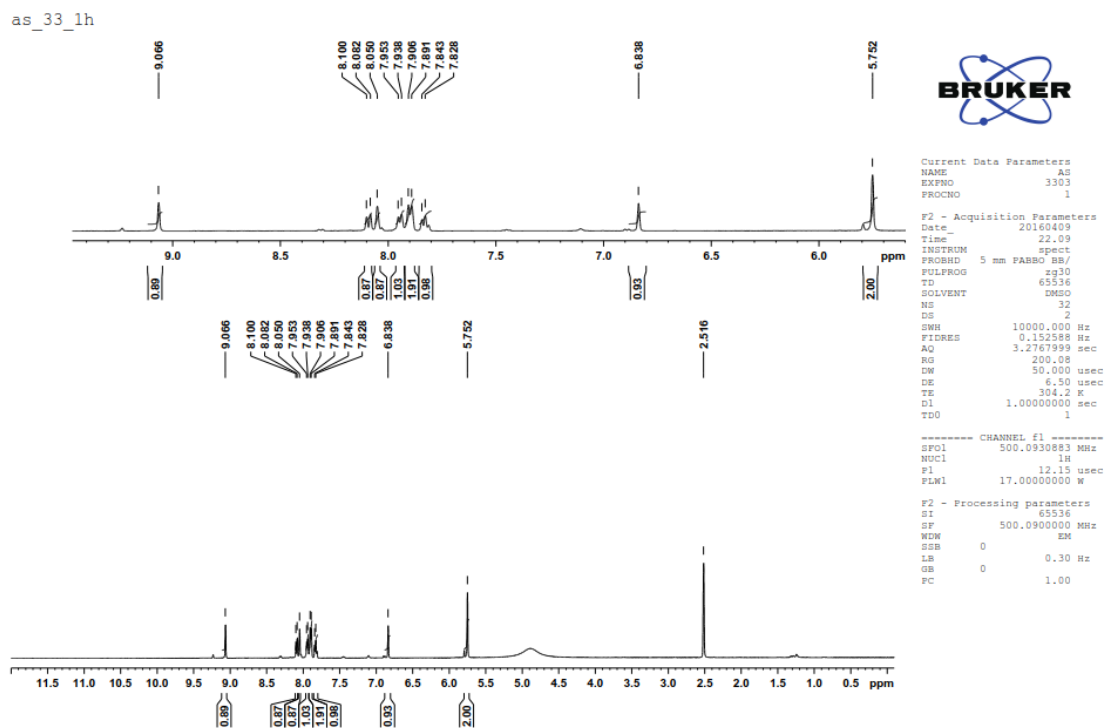

Figure S26: <sup>1</sup>H NMR spectra of compound 17

as\_33\_13C

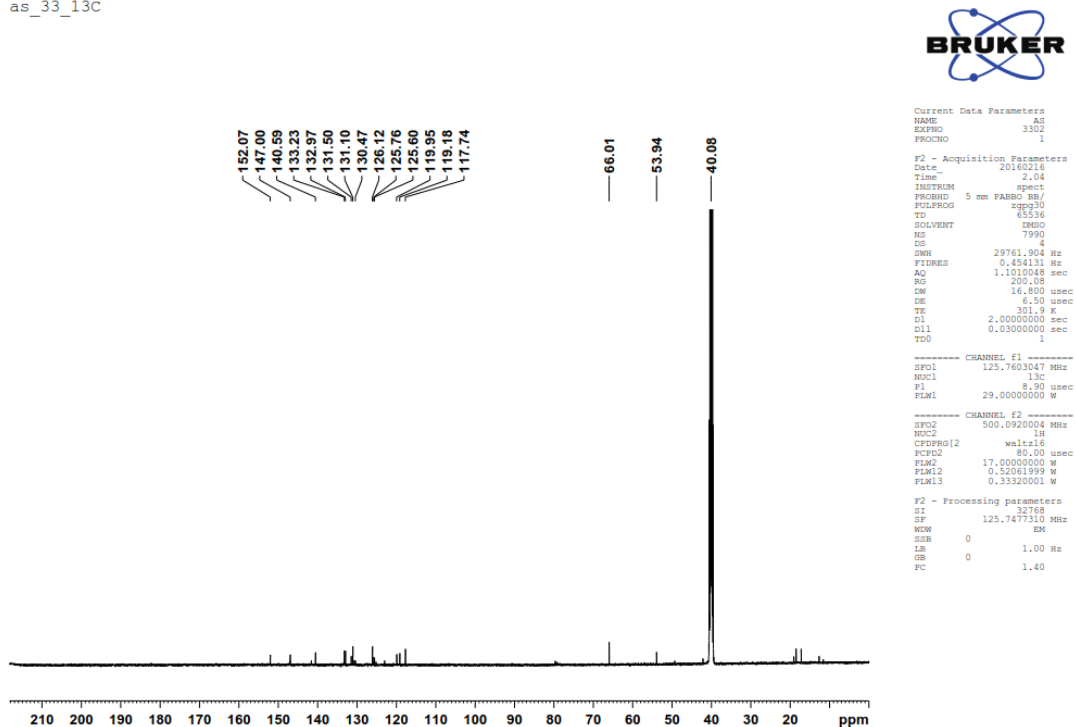

Figure S27:  $^{13}\text{C}$  NMR spectra of compound 17

as\_33\_19F

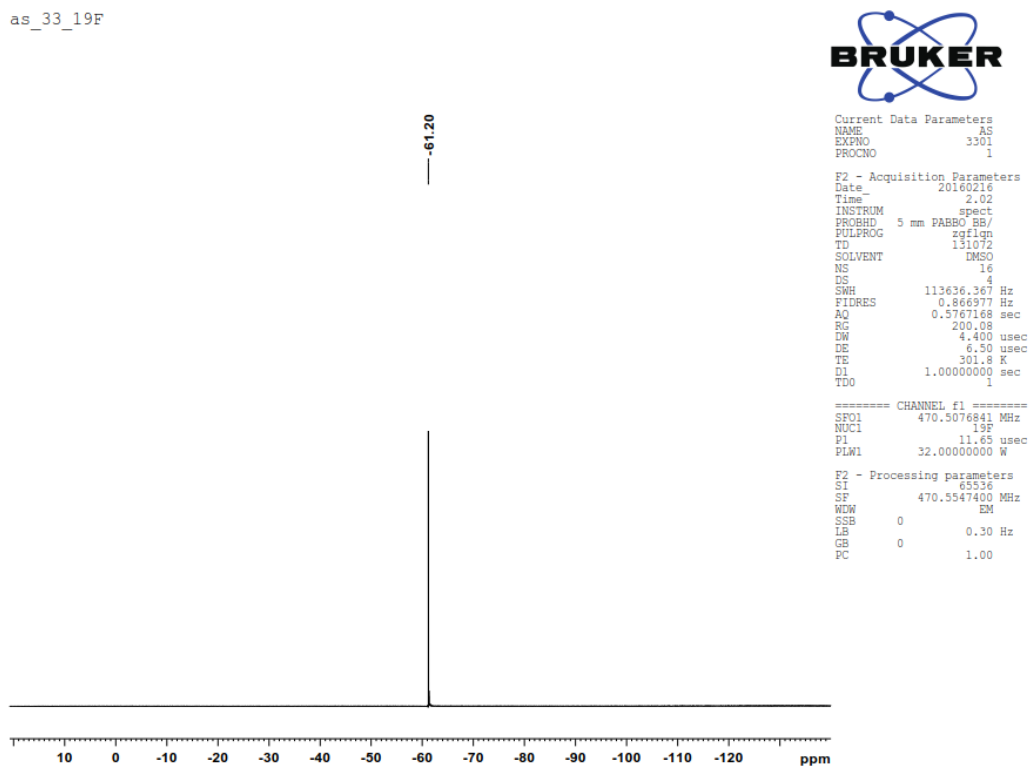

Figure S28:  $^{19}\text{F}$  NMR spectra of compound 17

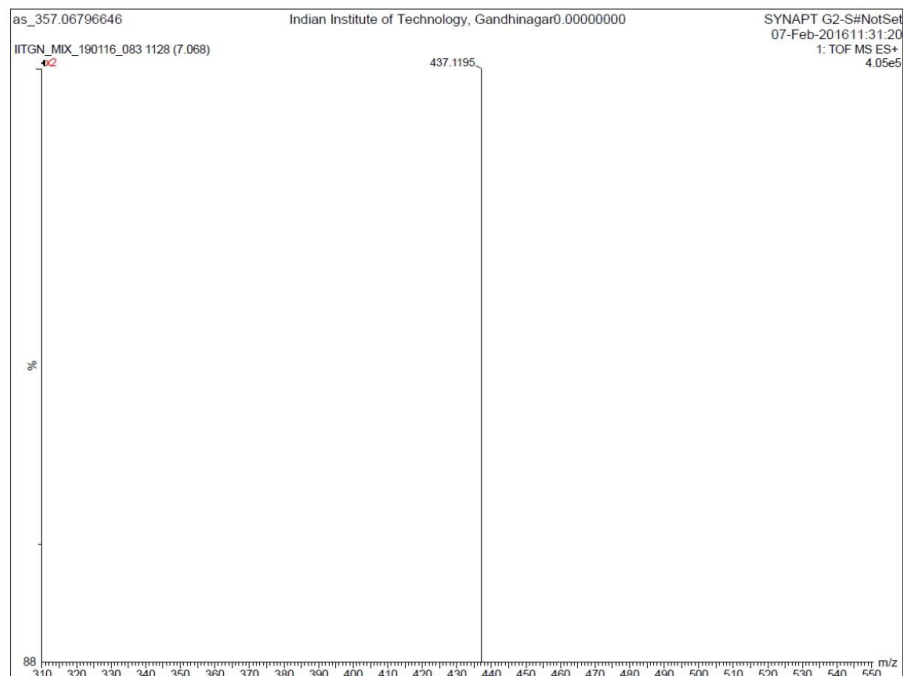

Figure S29: LC-Mass of compound 18

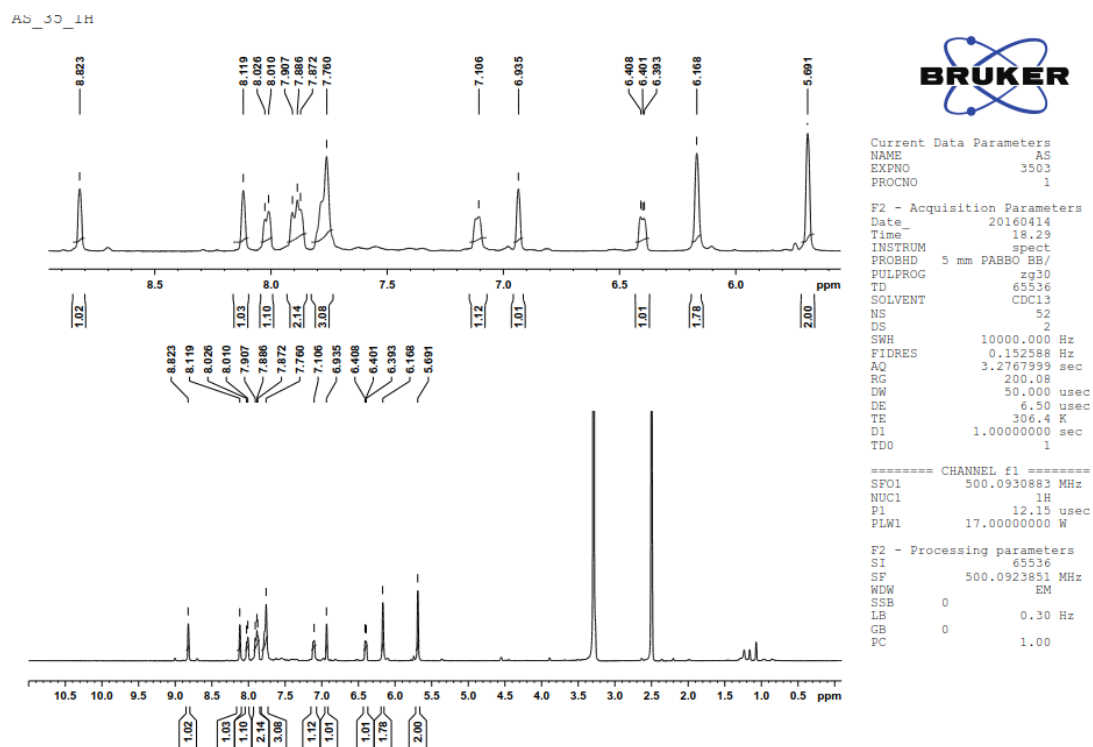

Figure S30: <sup>1</sup>H NMR spectra of compound 18

as\_035

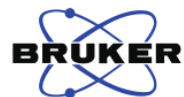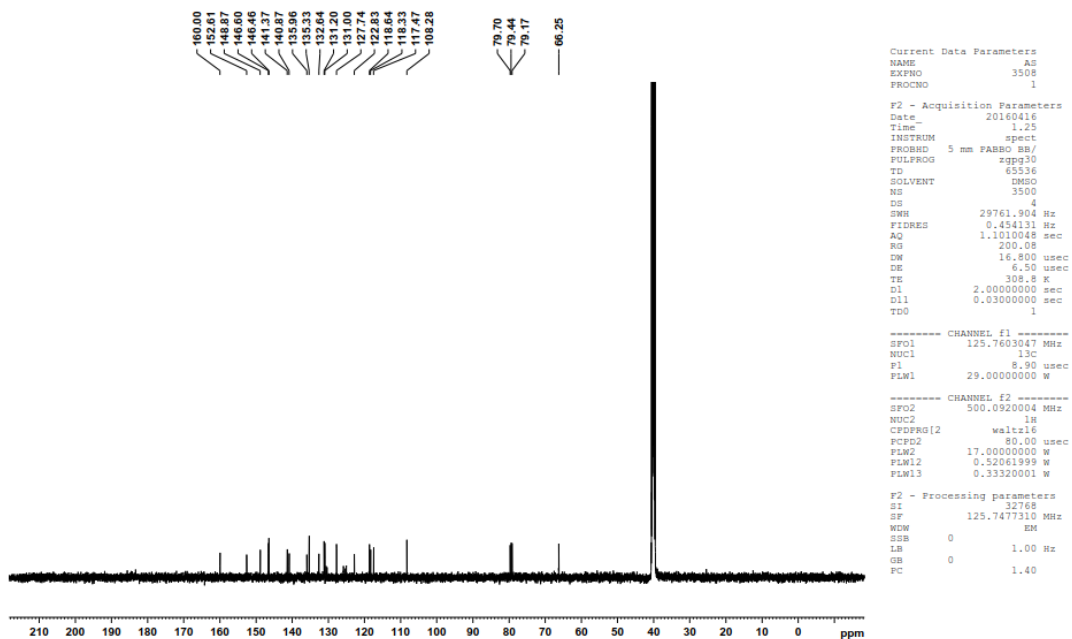

Figure S31:  $^{13}\text{C}$  NMR spectra of compound 18

AS\_35\_19F

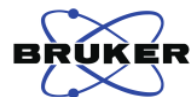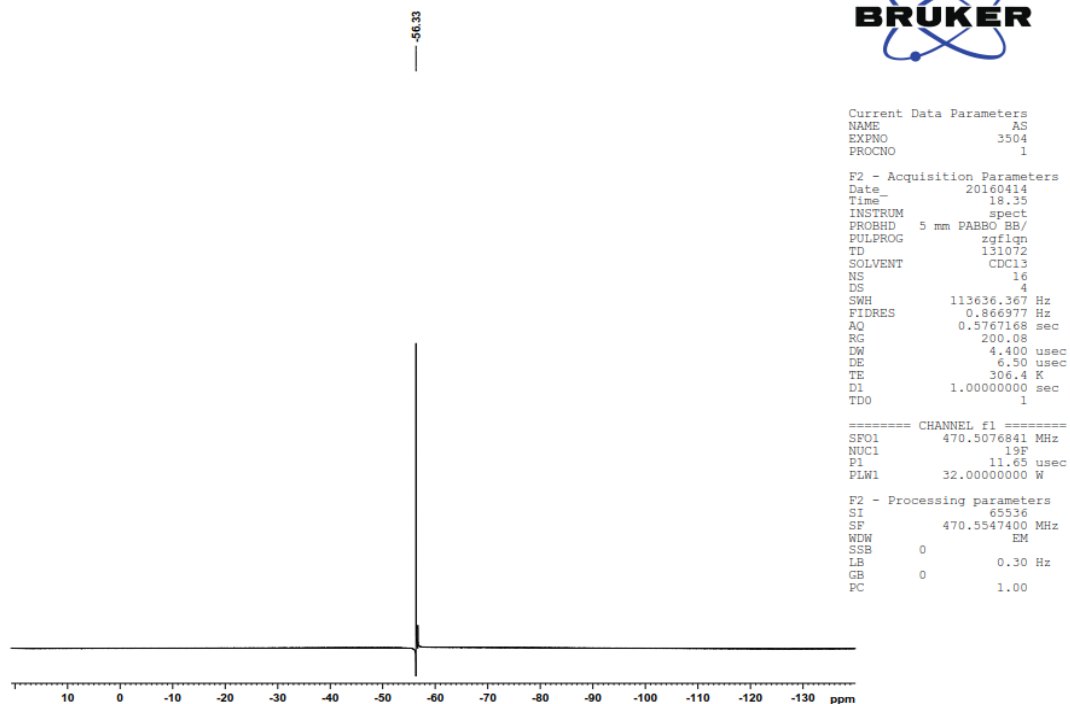

Figure S32:  $^{19}\text{F}$  NMR spectra of compound 18

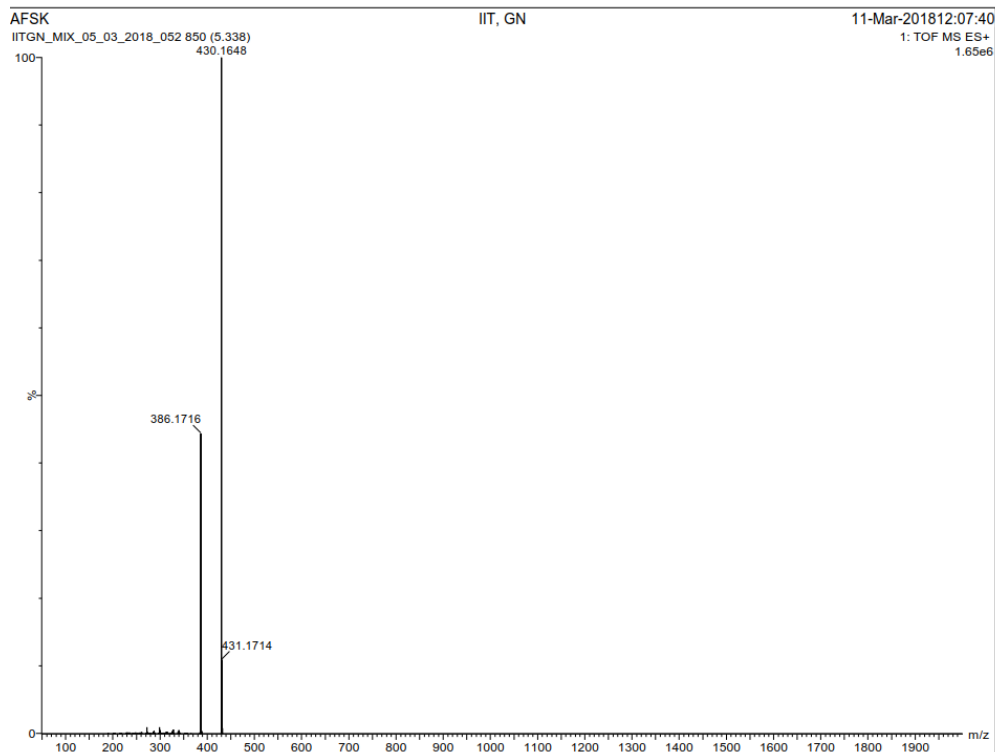

Figure S33: LC-Mass of compound 19

afsh\_5\_morphino

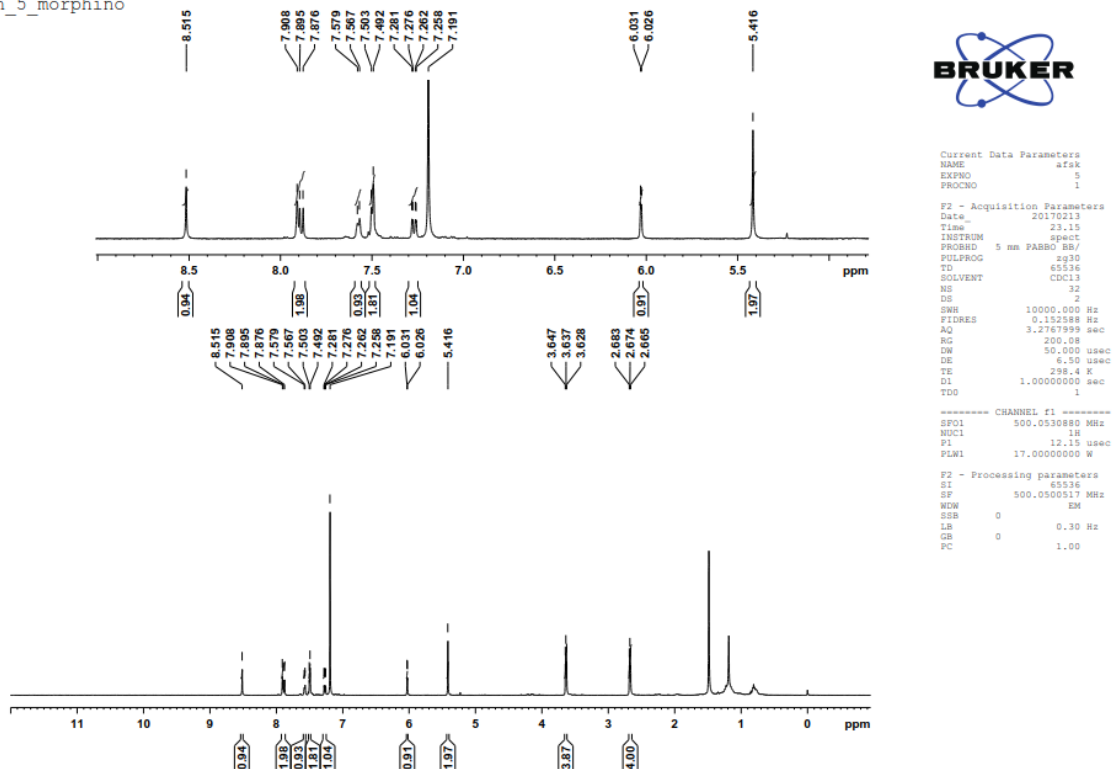

Figure S34: <sup>1</sup>H NMR spectra of compound 19

afsh\_5\_morphino

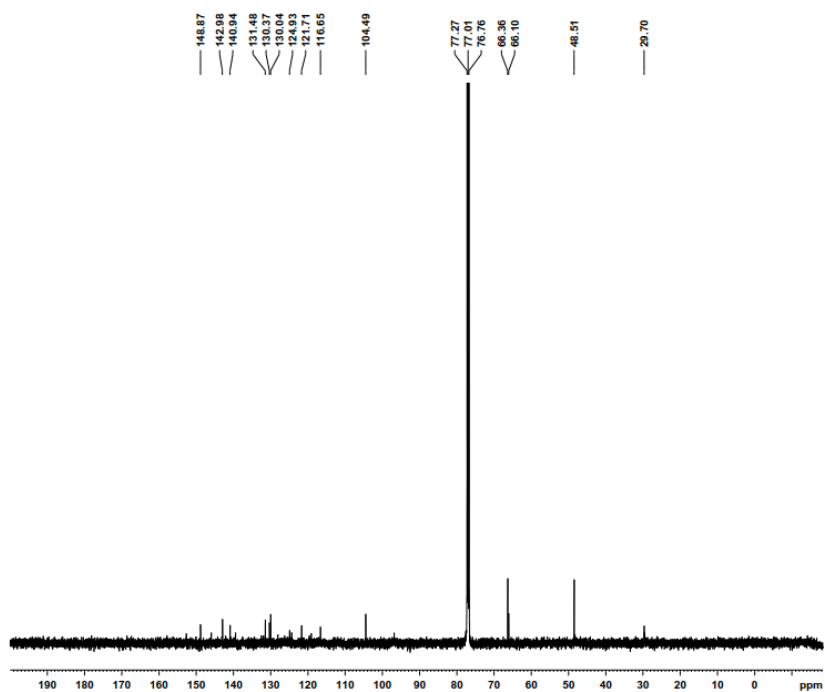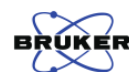

```

Current Data Parameters
NAME      afsk
EXPNO     5001
PROCNO    1

F2 - Acquisition Parameters
Date_     20170214
Time      3.46
INSTRUM   spect
PROBHD    5 mm PABBO BB/
PULPROG   zgpg30
TD         65536
SOLVENT   CDCl3
NS         5024
DS         4
SWH        29761.904 Hz
FIDRES     0.454131 Hz
AQ         1.1010048 sec
RG         200.08
DM         16.800 usec
DE         6.50 usec
TE         300.5 K
D1         2.00000000 sec
D11        0.03000000 sec
TD0        1

===== CHANNEL f1 =====
SFO1      125.7502457 MHz
NUC1       13C
P1         8.90 usec
PLW1       29.00000000 W

===== CHANNEL f2 =====
SFO2      500.0520002 MHz
NUC2       1H
CPDPRG2   waltz16
PCPD2     80.00 usec
PLW2       17.00000000 W
PLW12     0.3201999 W
PLW13     0.33320001 W

F2 - Processing parameters
SI         32768
SF         125.7376730 MHz
WDW        EM
SSB        0
LB         1.00 Hz
GB         0
PC         1.40
  
```

Figure S35:  $^{13}\text{C}$  NMR spectra of compound 19

afsh\_5\_morphino

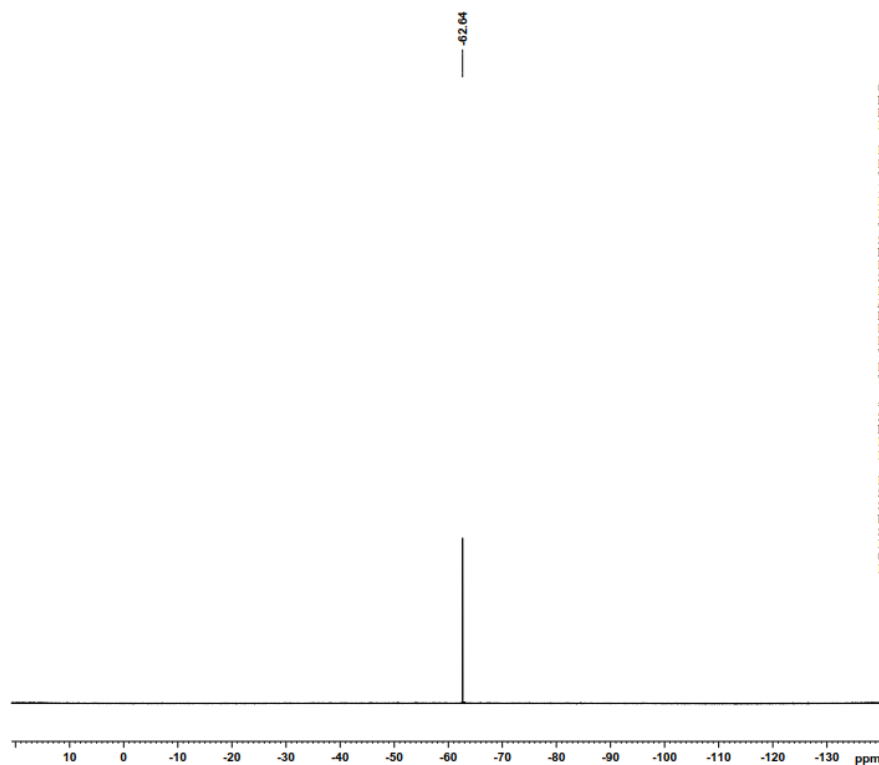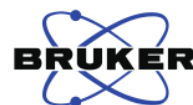

```

Current Data Parameters
NAME      afsk
EXPNO     5002
PROCNO    1

F2 - Acquisition Parameters
Date_     20170213
Time      23.20
INSTRUM   spect
PROBHD    5 mm PABBO BB/
PULPROG   zgfg1qn
TD         131072
SOLVENT   CDCl3
NS         16
DS         4
SWH        113636.367 Hz
FIDRES     0.866977 Hz
AQ         0.5767168 sec
RG         200.08
DM         4.400 usec
DE         6.50 usec
TE         298.4 K
D1         1.00000000 sec
TD0        1

===== CHANNEL f1 =====
SFO1      470.4700503 MHz
NUC1       19F
P1         11.65 usec
PLW1       32.00000000 W

F2 - Processing parameters
SI         65536
SF         470.5171020 MHz
WDW        EM
SSB        0
LB         0.30 Hz
GB         0
PC         1.00
  
```

Figure S36:  $^{19}\text{F}$  NMR spectra of compound 19

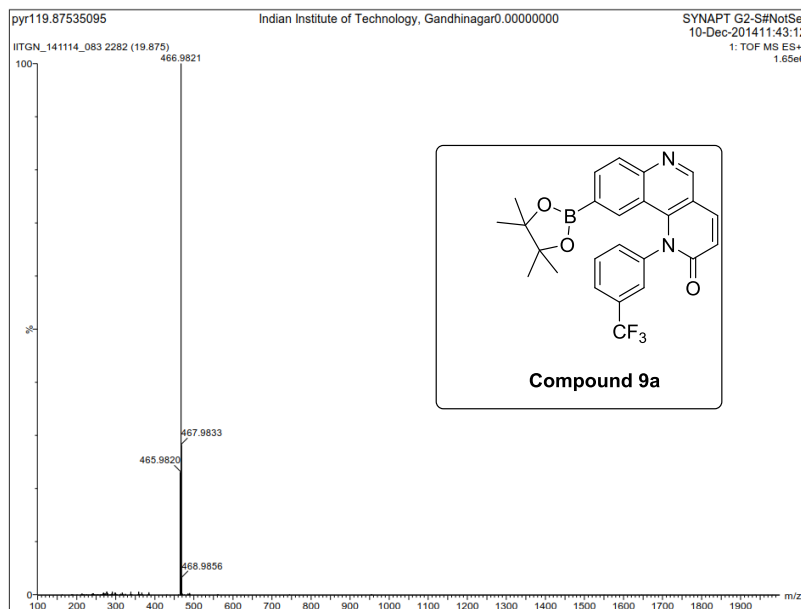

**Figure S37: LC-Mass of compound 9a**

### *Cell based studies*

#### *Materials and Methods*

Colon cancer cell line, HCT-116, was received as a kind gift from Dr. Virupakshi Sopinna (IIT Gandhinagar). DMEM, fetal bovine serum, pen-strep and cell extraction buffer were purchased from Invitrogen Corporation (Carlsbad, CA, USA). Complete EDTA-Free protease inhibitor tablets were purchased from Roche (Basel, Switzerland). Sodium dodecyl sulfate, tetramethylenediamine (TEMED), ammonium per sulphate, Tween-20,  $\beta$ -mercatopethanol, bromophenol blue, non-fat milk and bovine serum albumin were purchased from Sigma-Aldrich (Darmstadt, Germany). Clarity ECL western blotting substrate and immunoblot PVDF western blotting membrane were purchased from Bio-Rad laboratories (Hercules, CA, USA). Rabbit anti-human Chk1 phospho Ser 317 (Cat. 12302), mouse anti-human phospho p70 S6 kinase Thr389 (Cat. 9206) were purchased from Cell Signaling Technology (MA, USA) and mouse anti-human  $\beta$ -actin (Cat. SC47778) was from Santa Cruz Biotechnology (Dallas, Texas, USA). Anti-rabbit IgG HRP-linked secondary antibody (Cat. 7074) and anti-mouse IgG HRP-linked secondary antibody (Cat. 7076) were obtained from Cell Signaling Technology (MA, USA). CellTiter-Glo® Luminescent cell viability assay kit was purchased from Promega Corporation (Madison, WI, USA). 96- and 6-well plates were purchased from Corning (New York, USA).

#### *Cell viability assay*

Human HCT-116 cells were grown in DMEM/10% FBS/1% Pen-Strep medium at 37°C in a humidified incubator with 5% CO<sub>2</sub>. For the cell viability assay, cells were plated into 96-well plates at a count of 2000 cells per well in 198  $\mu$ l medium, incubated for 24 hours and then treated with increasing concentrations of

compound, respectively. After 72 hours of compound treatment, cell viability was determined using CellTiter-Glo® (Promega). Luminescence was measured by Envision Hybrid and modular multimode reader. All data were calculated by GraphPad Prism 6 software to get GI<sub>50</sub> of each compound.

### *Immunoblot assay*

HCT-116 cells were seeded in 6-well plates at a count of  $0.5 \times 10^6$  cells per well and incubated overnight in a humidified CO<sub>2</sub> incubator maintained at 37°C. For ATR assay, cells were exposed to 50 mJ/cm<sup>2</sup> of UV radiation energy (using UVP cross linker) after an hour of pre-treatment with appropriate compounds. Culture media was saved before UV treatment and added back to the cells after UV treatment. After another 1-hour incubation, cells were rinsed with ice-cold PBS and lysed in ice-cold cell extraction buffer. The soluble fractions of cell lysate were isolated by centrifugation at 13000rpm for 10 minutes at 4°C. Following that, concentration of the protein was normalized by Bradford assay. Cell lysates were then subjected to SDS-PAGE and immunoblotting.

### *Discussion*

The anticancer activity of all the synthesized compounds was performed against HCT-116 cell line at 1 µM concentration (Figure 7). Compound 13 and 14 showed strong inhibition similar to compound 11 (Torin2). Two novel potent compound inhibitors i.e., 13 and 14 were selected from the initial screening based cell viability assay and used to sensitize colon cancer cell line. We performed another cell viability assay across a dose range of both the compounds in colon cancer cell line. A dose range between 0nM and 1000nM was chosen. With an incubation time of up to 72 hours, compound 14 was more toxic than 13 with a GI<sub>50</sub> of 57 nM (Figure S38). Compound 13 also inhibited viability of colon cancer cells with a GI<sub>50</sub> of 138 nM (Figure S38). We confirmed that both 13 and 14 helped in sensitization of HCT-116 cells.

Based on the above mentioned results, to confirm if the compounds inhibit ATR and mTOR signaling in colon cancer cell line treated with radiation, an immunoblot assay was performed. Radiation was used as a part of combinatorial treatment as it is commonly used in colon cancer treatment. We assessed phosphorylation of Chk1 (p-Chk1<sup>S317</sup>) and p70 S6 kinase (p70 S6K<sup>T389</sup>) by immunoblotting of treated HCT-116 cells. p-Chk1<sup>S317</sup> and p70 S6K<sup>T389</sup> are downstream targets of ATR and mTOR, respectively. It was observed that 250 nM of 14 treatment inhibited phosphorylation of Chk1 (Ser 317) after treatment with UV radiation (Figure S40). Interestingly, phosphorylation of p70 S6 kinase (Thr 389) was observed to be inhibited by both compounds at 50 nM for 14 and 250 nM for 13 (Figure S40 and S41). Importantly, we confirmed that compound 14 inhibited the phosphorylation of ATR and mTOR substrates under these conditions. Whereas compound 13 inhibited the phosphorylation of mTOR substrate but not the ATR kinase substrate under UV treatment.

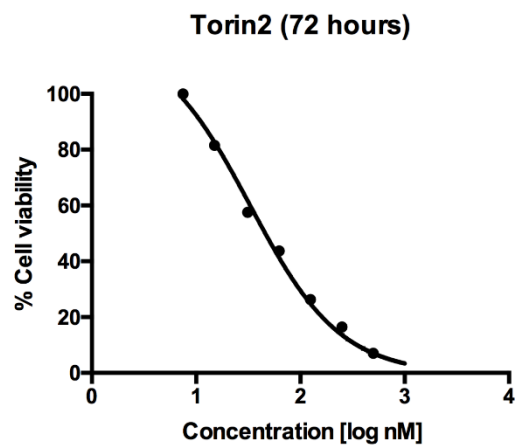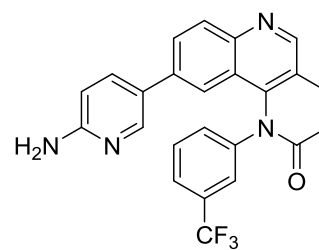

Torin2/11

GI<sub>50</sub> = 32.88 nM

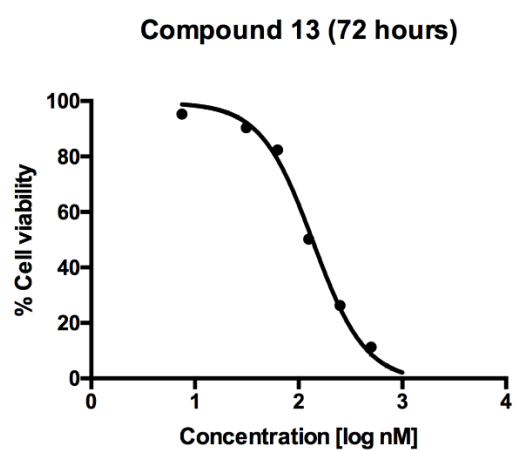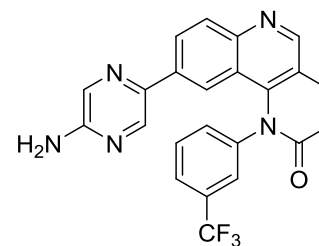

13

GI<sub>50</sub> = 138 nM

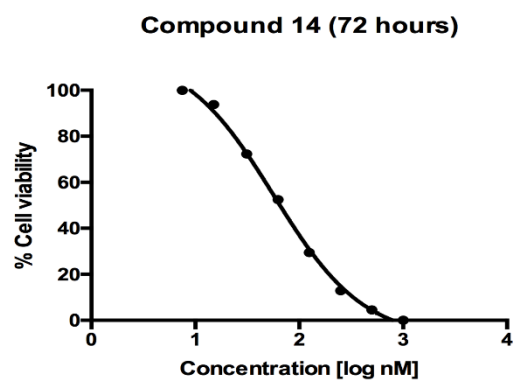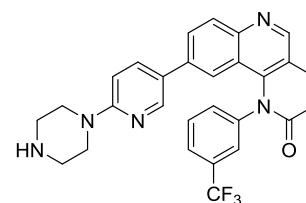

14

GI<sub>50</sub> = 57 nM

Figure S38: HCT-116 cell line was treated with increasing concentration of compound 11 (Torin2), compound 13 and 14 to determine their GI<sub>50</sub> values.

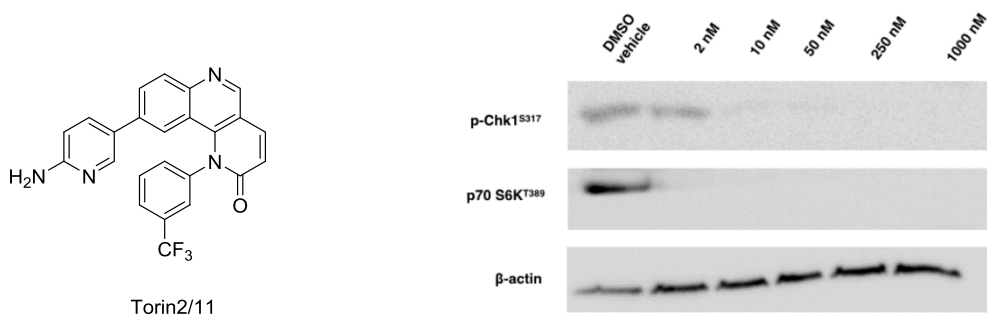

**Figure S39:** Torin2 /Compound 11 inhibits p-Chk1<sup>S317</sup> and p70 S6K<sup>T389</sup> phosphorylation in HCT-116 cell line (cells were irradiated with 50 mJ/cm<sup>2</sup> of UV radiation energy).

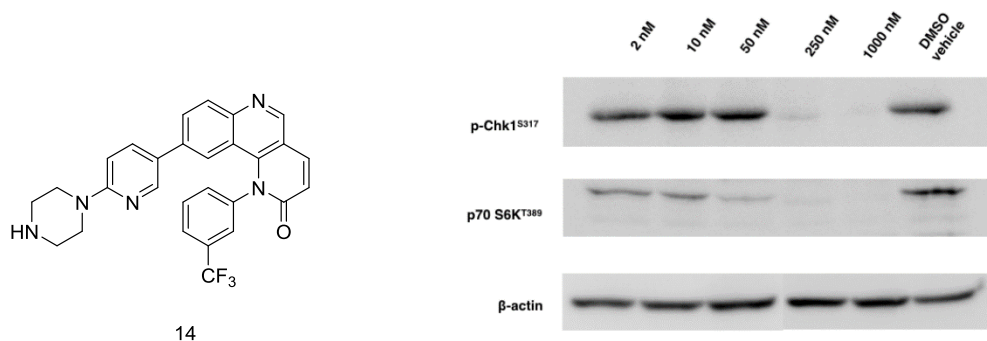

**Figure S40:** Compound 14 inhibits p-Chk1<sup>S317</sup> and p70 S6K<sup>T389</sup> phosphorylation in HCT-116 cell line (cells were irradiated with 50 mJ/cm<sup>2</sup> of UV radiation energy).

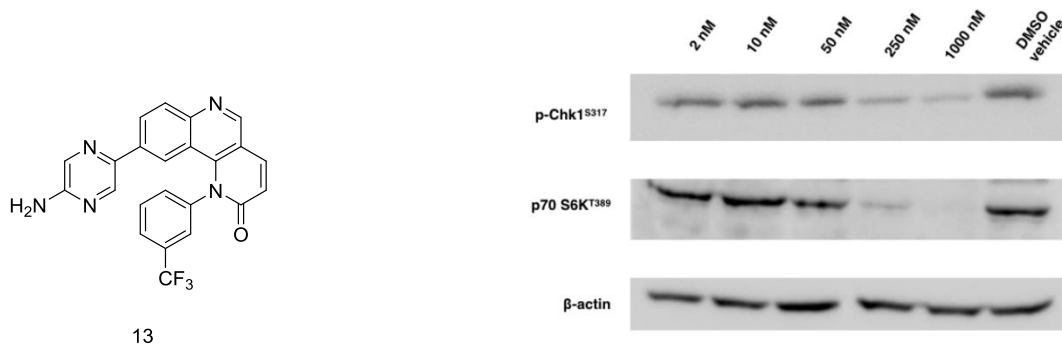

**Figure S41:** Compound 13 inhibits p70 S6K<sup>T389</sup> phosphorylation in HCT-116 cell line (cells were irradiated with 50 mJ/cm<sup>2</sup> of UV radiation energy).
